# Supplementary material for: Accumulation of 4-Hydroxynonenal Characterizes Diabetic Fat and Modulates Adipogenic Differentiation of Adipose Precursor Cells
Source: MDPI journal article supplement (doi:10.3390/ijms242316645), 2023-11-23
Supplement: s1 [file s1]

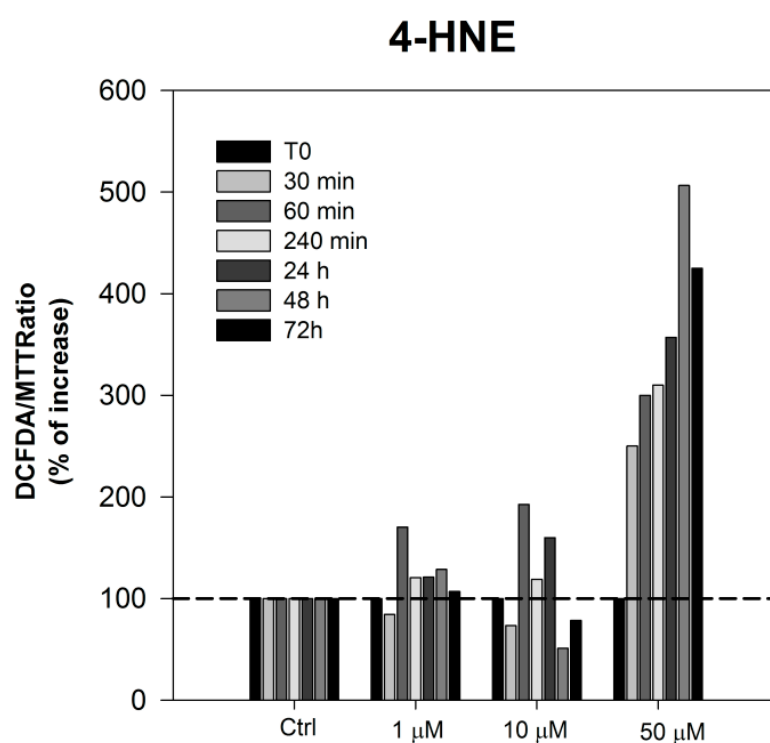

**Figure S1.** Intracellular ROS levels in human ASCs after challenging with increasing concentrations of 4-HNE. Data are adjusted for cell viability as determined by MTT test and expressed as percentage of optical density relative to control test (Ctrl) that was considered as 100%.
